# Supplementary material for: Top-down acetylcholine signaling via olfactory bulb vasopressin cells contributes to social discrimination in rats
Source: PubMed Central journal article supplement (PMC8140101; doi:10.1038/s42003-021-02129-7), 2021-05-21
Supplement: 42003_2021_2129_MOESM2_ESM.pdf [file 42003_2021_2129_MOESM2_ESM.pdf]

## **Supplementary Information**

### **Title**

Top-down acetylcholine signaling via olfactory bulb vasopressin cells contributes to social discrimination in rats

### **Authors**

Hajime Suyama<sup>1</sup>, Veronica Egger<sup>1</sup>, Michael Lukas<sup>1</sup>

<sup>1</sup>Institute of Zoology, Neurophysiology, University of Regensburg, 93040 Regensburg, Germany

### **Corresponding author**

Michael Lukas

Institute of Zoology, Neurophysiology, University of Regensburg, 93040 Regensburg, Germany

e-mail: michael.lukas@ur.de

Supplementary Fig. 1 VPC activation in the MOB and AOB

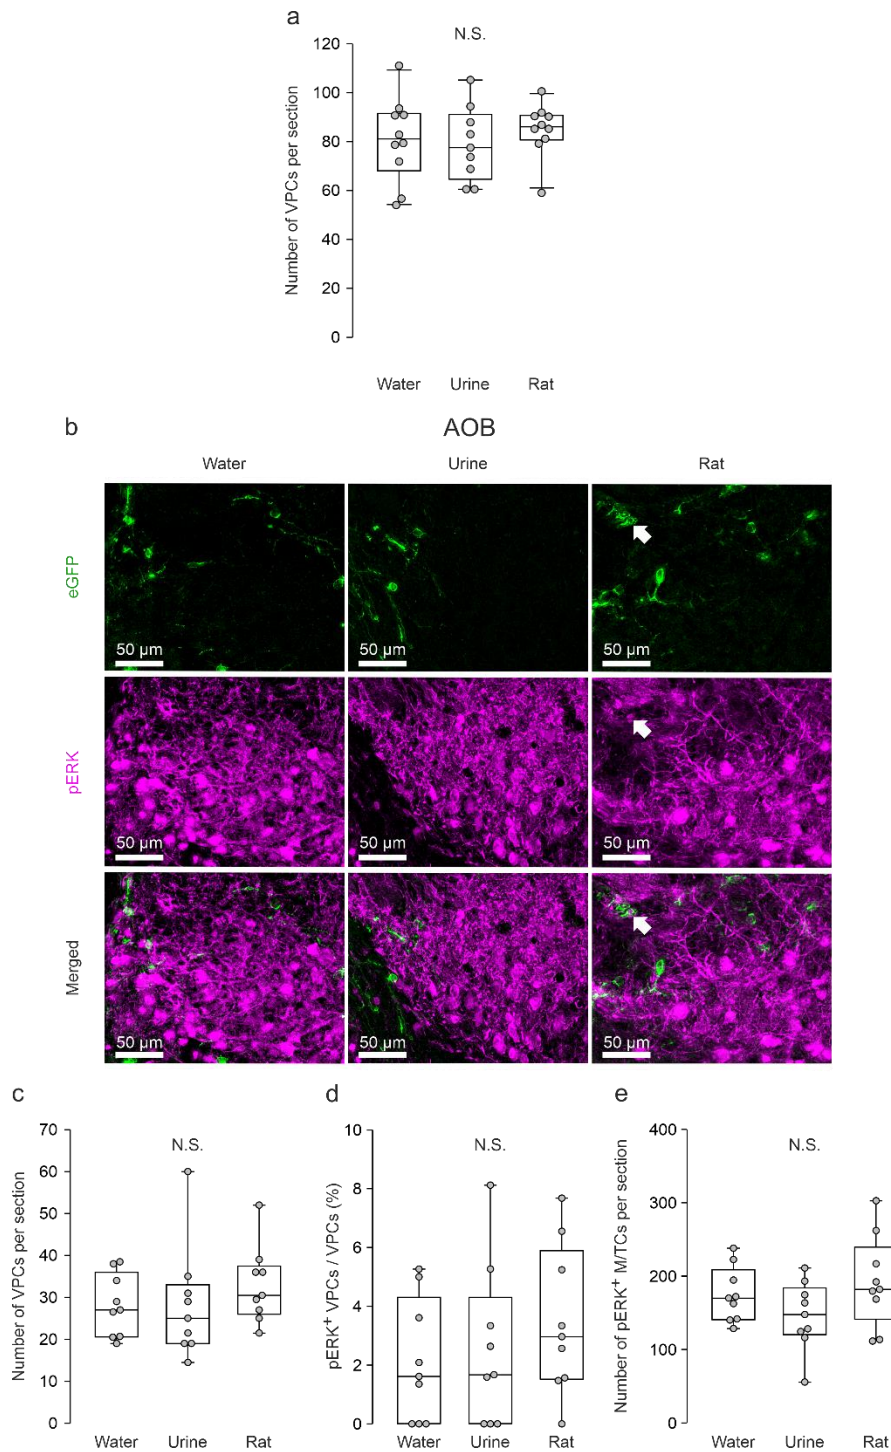

(a) Averaged number of MOB VPCs per section in different stimulation groups.  $n=10$  rats (water),  $n=9$  rats (urine),  $n=10$  rats (rat). Data are presented as box-plots including first, median, and third quartiles with whiskers representing the range of data points and distribution of single data points. One-way ANOVA, N.S., not significant. (b) Representative average z-projections of the accessory olfactory bulb that were immune-stained for eGFP (green, CF488) and pERK (magenta, CF 594) following water, urine, or rats stimulation. Arrows indicate a cell that is double-labeled for eGFP and pERK. Scale bar, 50  $\mu$ m valid for all images in the panel. (c) Averaged number of AOB VPCs per section in different stimulation groups. (d) Averaged fraction of pERK<sup>+</sup> AOB VPCs of all AOB VPCs in different stimulation groups (%). (e) Averaged number of pERK<sup>+</sup> AOB M/T-Cs per section in different stimulation groups. Data are presented as box-plots including first, median, and third quartiles with whiskers representing the range of data points and distribution of single data points. One-way ANOVA, N.S., not significant.  $n=9$  rats (water),  $n=9$  rats (urine),  $n=9$  rats (rat).

Supplementary Fig. 2 **ACh does not alter intrinsic excitability in VPCs and electrical AOB stimulation does not evoke excitatory responses in MOB VPCs**

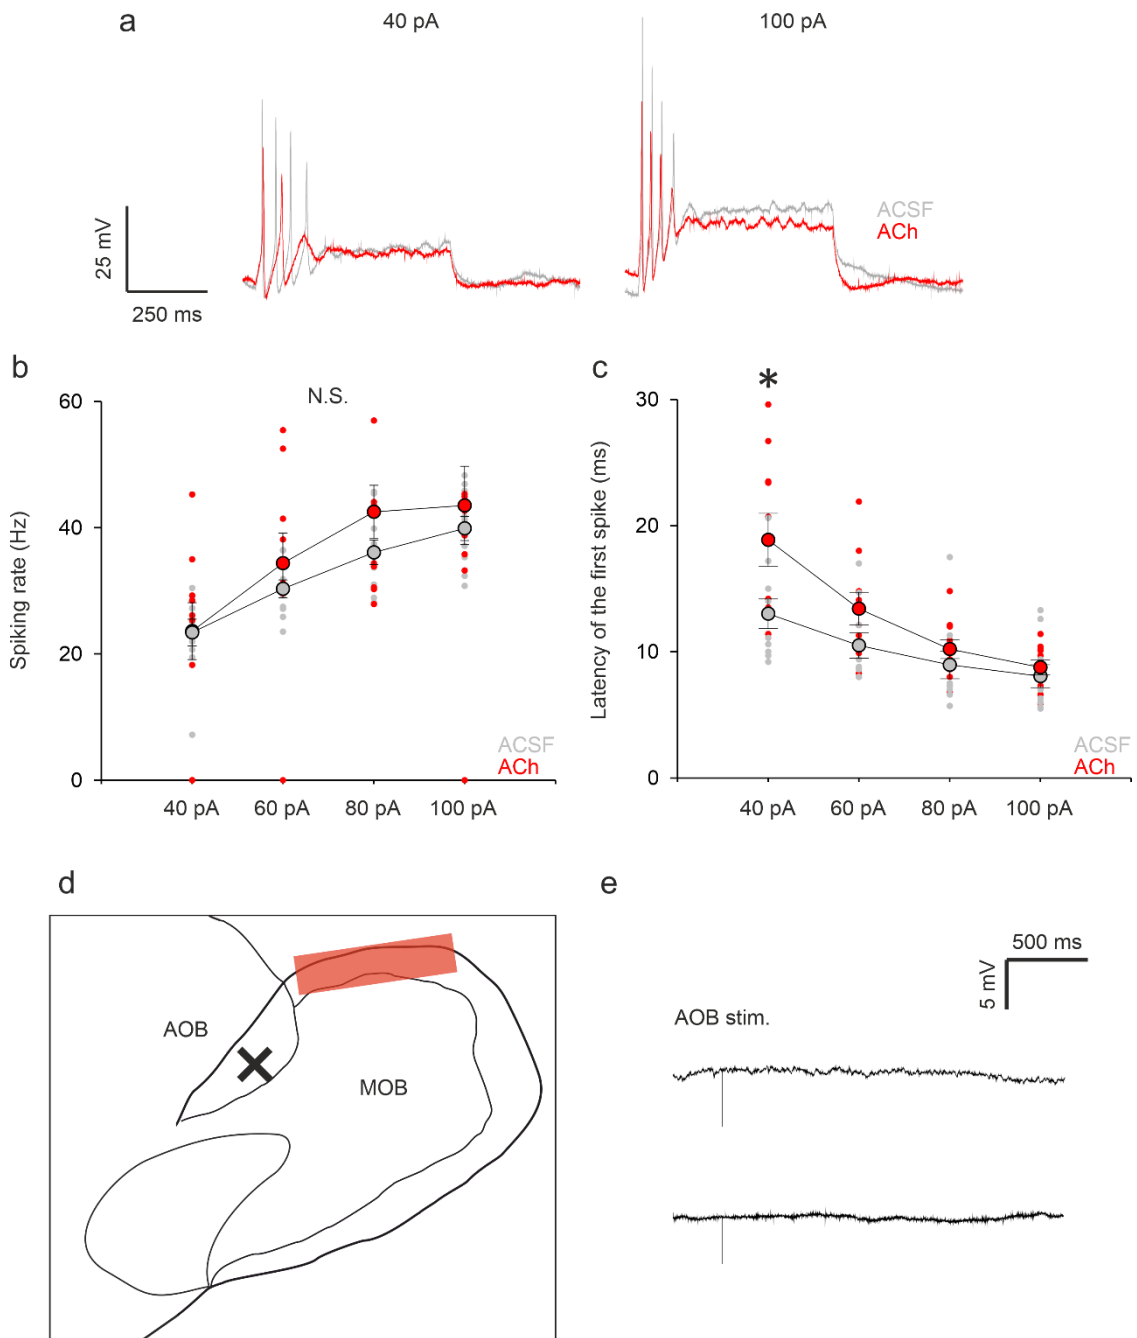

(a) Representative traces of responses to somatically applied current steps in the ACSF condition (grey) and during bath application of ACh (100  $\mu$ M, red). (b+c) Spiking rates of action potential trains and latency of the first spike evoked by somatic current injection (40-100 pA) in the ACSF condition (grey) and during bath application of ACh (100  $\mu$ M, red). (2)  $\times$  (2) mixed model ANOVA (intensity [within subject]  $\times$  treatment [within-subject]). N.S., not significant. LSD for single comparison,  $*p < 0.05$  ACh (40pA) vs. ACSF (40pA). Data are means  $\pm$  SEM including distribution of single data points.  $n = 10$  cells. (d) Schematic drawing of the sagittal OB. The cross indicates where the stimulation electrode was positioned. The red bar indicates the dorsal region of the MOB where patch-clamp recordings from MOB VPCs were performed. (e) Representative averaged trace of response from MOB VPCs to electrical vomeronasal nerve/ AOB stimulation (50-500  $\mu$ A, 100  $\mu$ s).

Supplementary Fig. 3 Intracellular calcium indicator does not alter ACh effects on evoked PSP amplitudes in VPCs

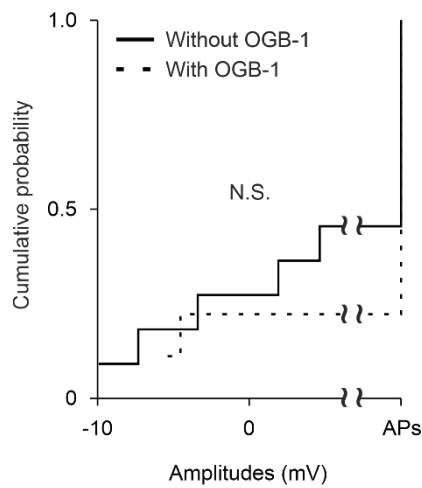

Cumulative probability of evoked PSP amplitudes in the ACh condition with or without OGB-1 in the intracellular solution (n=9/11 cells). The amplitudes of APs were set as 100 mV. Kruskal-Wallis test for variation comparison. N.S., not significant.

Supplementary Fig. 4 **Atropine and VP microinjection into the OB does not interfere with non-social investigatory/play behavior and habituation.**

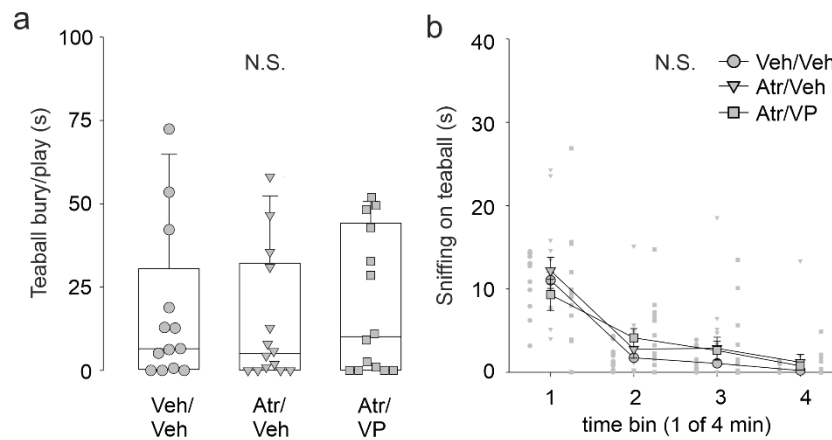

(a) Amount of time (in s) that rats are engaged in burying/playing with the teaball during neutral odor stimulation (amylacetate or carvone). Data are presented as box-plots including first, median, and third quartiles with whiskers representing the range of data points and distribution of single data points. Kruskal-Wallis Test,  $n=13$  rats (Veh/Veh),  $n=14$  rats (Atr/Veh,  $1\mu\text{g}$ ),  $n=14$  rats (Atr/VP,  $1\mu\text{g}/1\text{ng}$ ). (b) Amount of time (in s) within time bins of 1 min rats investigate the teaball during neutral odor presentation. Data are presented as means  $\pm$  SEM including distribution of single data points.  $(4 \times 3)$  mixed model ANOVA (time bin [within-subject]  $\times$  treatment [between-subject]),  $n=13$  rats (Veh/Veh),  $n=14$  rats (Atr/Veh,  $1\mu\text{g}$ ),  $n=14$  rats (Atr/VP,  $1\mu\text{g}/1\text{ng}$ ). N.S., not significant.
