# Supplementary material for: Top-down acetylcholine signaling via olfactory bulb vasopressin cells contributes to social discrimination in rats
Source: PubMed Central journal article supplement (PMC8140101; doi:10.1038/s42003-021-02129-7), 2021-05-21
Supplement: 42003_2021_2129_MOESM3_ESM.pdf [file 42003_2021_2129_MOESM3_ESM.pdf]

Descriptions of Additional Supplementary Files

**Supplementary data 1**

**Description:** All source data underlying the graphs and charts presented in the main figures.
